1 **ZnJ6 is a DnaJ-like Chaperone with Oxidizing Activity in the Thylakoid**  
2 **Membrane in *Chlamydomonas reinhardtii***

3

4 **Richa Amiya and Michal Shapira**

5 Department of Life Sciences, Ben-Gurion University of the Negev, Beer-Sheva, Israel.

6

7

8 **Corresponding author:** Prof. Michal Shapira

9 Department of Life Sciences

10 Ben-Gurion University of the Negev

11 POB 653, Beer Sheva, Israel

12 [shapiram@bgu.ac.il](mailto:shapiram@bgu.ac.il)

13

14

15 **Short title:** ZnJ6 is an algal DnaJ-like oxidizing chaperone

16

17

18 **One-sentence summary:** ZnJ6 is a redox-regulated DnaJ-like chaperone associated with the  
19 thylakoid membrane and involved in the prevention of protein aggregation and stress endurance.

20

21

22 **Author contribution:**

23 Conceptualization: M.S. and R.A. conceived the research. R.A. performed the experiments and M.S.  
24 supervised them. M.S. agrees to serve as the author responsible for contact and ensures communication.

25

26 **Funding Information:** R.A. is a recipient of the Kreitman fellowship for foreign students at  
27 BGU. M.S. is a recipient of ISF grant 515/02 and Sol Leshin Program for Collaboration between  
28 BGU and UCLA

29

30

31

32 **ABSTRACT**

33 Assembly of photosynthetic complexes is sensitive to changes in light intensities, drought, and  
34 pathogens that induce a redox imbalance, and require a variety of substrate-specific chaperones  
35 to overcome the stress. Proteins with cysteine (C) residues and disulfide bridges are more  
36 responsive to the redox changes. This study reports on a thylakoid membrane-associated DnaJ-  
37 like protein, ZnJ6 (ZnJ6.g251716.t1.2) in *Chlamydomonas reinhardtii*. The protein has four  
38 CXXCX(G)X(G) motifs that form a functional zinc-binding domain. Site-directed mutagenesis  
39 (Cys to Ser) in all the CXXCX(G)X(G) motifs eliminates its zinc-binding ability. In vitro  
40 chaperone assays using recombinant ZnJ6 confirm that it is a chaperone that possesses both  
41 holding and oxidative refolding activities. Although mutations (Cys to Ser) do not affect the  
42 holding activity of ZnJ6, they impair its ability to promote redox-controlled reactivation of  
43 reduced and denatured RNaseA, a common substrate protein. The presence of an intact zinc-  
44 binding domain is also required for protein stability at elevated temperatures, as suggested by a  
45 single spectrum melting curve. Pull-down assays with recombinant ZnJ6 revealed that it interacts  
46 with oxidoreductases, photosynthetic proteins (mainly PSI), and proteases. Our *in vivo*  
47 experiments with *Chlamydomonas reinhardtii* insertional mutants ( $\Delta$ ZnJ6) expressing a low  
48 level of ZnJ6, suggested that the mutant is more tolerant to oxidative stress. In contrast, the wild  
49 type has better protection at elevated temperature and DTT induced stress. We propose that  
50 DnaJ-like chaperone ZnJ6 assists in the prevention of protein aggregation, stress endurance, and  
51 maintenance of redox balance.

52

53

## 54 INTRODUCTION

55 Photosynthetic organisms are often challenged by biotic and abiotic stresses, resulting in a redox  
56 imbalance that must be counteracted by the organism to survive. The redox status of proteins in  
57 the chloroplast is mainly controlled and influenced by photosynthetic light reactions, which can  
58 lead to a rise in the generation of Reactive Oxygen Species (ROS) during stress. This occurs  
59 when the cells cannot dissipate excess of electrons due to an imbalance between the excited  
60 electrons and the carrier pathways (Erickson et al., 2015). Proteins containing cysteine residues  
61 and disulfide bridges are sensitive to redox changes that affect the redox status of these bridges,  
62 thus leading to structural changes, altered ability to function, and impaired ability to interact with  
63 partner proteins. Redox status of proteins, therefore, plays an essential role in cell signaling and  
64 anti-oxidizing defence (Klomsiri et al, 2011).

65 Here we focus on a novel thylakoid membrane-associated oxidase ZnJ6  
66 (ZnJ6.g251716.t1.2) from *C. reinhardtii*. The protein contains four cysteine-rich CXXCX(G)X(G)  
67 motifs that form two C<sub>4</sub> type zinc fingers. Given the similarity in this domain to that of DnaJ,  
68 ZnJ6 is categorized as a DnaJ-like protein (DnaJ E). It lacks all other motifs that are typical of  
69 DnaJ, such as the J and G/F domains, and there is also no homology to DnaJ in its C-terminus  
70 (Doron et al, 2018). To date, 20 proteins from this family were identified in *Arabidopsis* (Pulido  
71 and Leister, 2018), but their orthologs in *Chlamydomonas* were not yet determined, mainly due  
72 to their limited similarities. Many of the DnaJ-like proteins have a role as chaperones and in the  
73 assembly of photosynthetic complexes. One example is the Bundle Sheath Defective gene  
74 (BSD2) that was initially identified in maize as required for Rubisco biogenesis. (Brutnell 1990).  
75 BSD2 was extensively studied (Feiz et al., 2014) (Wostrikoff and Stern, 2007) and further  
76 verified as one of the five chaperones used for *in vitro* assembly of Rubisco (Aigner et al, 2017).  
77 Other examples are the thylakoid associated DnaJ-like PSA2 and LQY1 proteins, which interact  
78 with components of the PSI and PSII complexes, respectively (Fristedt et al, 2014)(Lu et al,  
79 2011). Although a phylogenetic analysis identified ZnJ6 as the closest ortholog of the Maize  
80 BSD2 (Doron et al, 2018), here we show that ZnJ6 has a transmembrane domain and localizes  
81 in the thylakoid membrane, thus suggesting that it could have a different role.

82 ZnJ6 exhibits chaperone function, like other members of the DnaJ-like family of  
83 chloroplast proteins (Doron et al, 2018). We show that ZnJ6 has a protective role in preventing

84 aggregation *in vitro* of Citrate Synthase (CS), a thermal sensitive protein target common in  
85 chaperone assays to examine protection against aggregation (Segal and Shapira, 2015). ZnJ6  
86 protects CS regardless of its cysteine-rich domain. However, the cysteine dependent oxidative  
87 refolding ability of the protein was restricted to the recombinant wild type protein, and was not  
88 observed with its cys-mutant. The redox activity was established first by the Insulin aggregation  
89 assays, in which reduction opens the disulfide bonds that hold the two insulin subunits together,  
90 causing the  $\beta$ -subunit to precipitate. ZnJ6 was shown to prevent this precipitation. Another assay  
91 aimed to analyze the effect of ZnJ6 on the refolding of reduced denatured RNaseA (rdRNaseA),  
92 a redox-sensitive chaperone target. ZnJ6 assisted the native refolding and oxidation of  
93 rdRNaseA, thereby regaining its lost activity. However, the recombinant cys-mutant of ZnJ6 was  
94 not functional in both assays. Furthermore, the role of the zinc finger domain in providing  
95 protein stability at elevated temperature was established using a single spectrum melting curve.

96 To explore the potential role of ZnJ6, its interactome was examined as well. This analysis  
97 highlighted that ZnJ6 interacts with photosynthetic proteins, oxidoreductases, and proteases. To  
98 expand our understanding of the ZnJ6 function, we examined the role of the ZnJ6 *in vivo* using a  
99 *C. reinhardtii* insertional mutant ( $\Delta$ ZnJ6) that expresses a low level of the protein. When  
100 compared to wild type cells,  $\Delta$ ZnJ6 was more tolerant to oxidative stress caused by H<sub>2</sub>O<sub>2</sub> and  
101 MeV, but appeared to be more sensitive to reducing conditions induced by DTT. The mutants  
102 also appeared to be sensitive to heat stress, with impaired growth and reduction in chlorophyll  
103 levels. Altogether ZnJ6 functions as a chaperone that also possesses oxidizing activity. It could  
104 therefore assist the cells in overcoming redox-related stress and possibly be involved in the  
105 assembly of the photosynthetic apparatus.

106

107

## 108 RESULTS

### 109 **ZnJ6 from *C. reinhardtii* is localized in the Thylakoid membrane of the chloroplast**

110 The localization of the protein in the cell can serve as the first indication for its potential  
111 function. For this, we determined the intracellular localization of ZnJ6 using biochemical sub-  
112 fractionation, followed by western analysis. Cytoplasmic fractions from a 1L culture were  
113 collected immediately after cell disruption by nitrogen cavitation and centrifugation, before  
114 chloroplast isolation. Chloroplasts were isolated using a Percoll step gradient. Isolated  
115 chloroplasts were washed and tested for the presence of intact chloroplasts. Thylakoid  
116 membranes were isolated from 250 ml of log-phase *Chlamydomonas* cells using a 3-step sucrose  
117 gradient (as described in the Materials and Methods section).

118 The isolated subcellular fractions, along with total cell protein, were subjected to western  
119 analysis using antibodies against marker proteins typical for each fraction. The cytoplasmic  
120 fraction was verified by its interaction with antibodies against HSP70A, and the chloroplast  
121 fraction was confirmed by its interaction with antibodies against the Oxygen evolving enzyme  
122 (OEE33) (Figure 1 A). ZnJ6 was in the chloroplast fraction. Next, membrane (M) and soluble (S)  
123 fractions of *C. reinhardtii* cells were also resolved over 12% SDS-PAGE. The membrane  
124 fraction was verified by antibodies against psbA, and the soluble fraction was verified by  
125 antibodies against HSP70A. Antibodies against Rubisco Activase showed that this protein was  
126 distributed between the membrane and soluble fractions. The presence of ZnJ6 in the membrane  
127 fraction was confirmed using specific antibodies raised against amino acids 1-165 (Figure 1B  
128 and supplemental figure S1). Finally, the thylakoid fraction was verified by antibodies against  
129 psbA. ZnJ6 was also shown to be in the thylakoid fraction (Figure 1C). This finding is supported  
130 by the presence of a predicted transmembrane domain in ZnJ6, as shown by TMHMM and  
131 Phobius servers (Supplemental Figure S2).

132

### 133 **CD analysis of affinity-purified ZnJ6 verifies that the recombinant protein is folded**

134 To confirm whether the recombinant protein was folded, to examine its stability at high  
135 temperatures, and to test whether the Zn binding domain affected the folding, we measured the  
136 Circular Dichroism (CD) spectra of the recombinant wild type and cys-mutant proteins.  
137 Recombinant protein tagged with cleavable the Maltose Binding Protein tag (MBP) and the non-  
138 cleavable Streptavidin Binding Peptide (SBP). The protein was first purified over an amylose

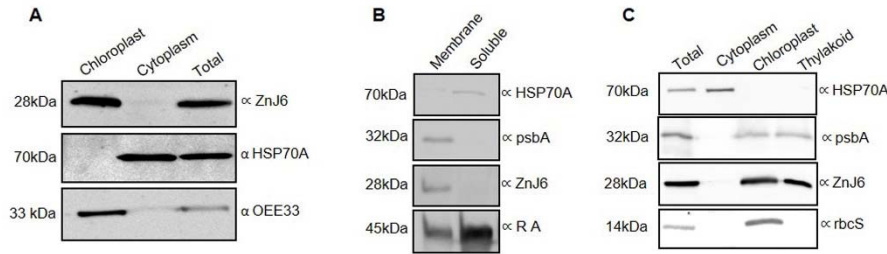

**Figure 1. ZnJ6 is localized in the thylakoid membrane of the chloroplast.** *C. reinhardtii* cells were grown until the late log phase and disrupted by nitrogen cavitation and further subfractionated. **A**, The purified chloroplasts, cytoplasm, and total proteins were subjected to western analysis using antibodies against OEE33 as a chloroplast marker and HSP70A as a cytoplasmic marker. **B**, The membrane and soluble fractions of *C. reinhardtii* cells were separated, and the presence of ZnJ6 in the membrane fraction was confirmed. psbA served as a membrane marker, and Rubisco Activase (RA) was a marker that is distributed between the membrane and soluble fractions. **C**, Thylakoid membranes were isolated using a sucrose step gradient. Samples taken from the total extracts, cytoplasm, chloroplast, and thylakoid fractions were subjected to western analysis using antibodies against psbA as a thylakoid marker, rbcS as chloroplast markers, and HSP70A served as a cytoplasmic marker. Antibodies ZnJ6 specific antibodies unveiled its presence in the thylakoid membrane.

139 resin. The MBP tag was further cleaved from the fusion protein and the protein was further  
140 purified over Streptavidin resin (purified protein fraction was analysed over 12 % SDS gel, as  
141 shown in supplemental S3). 100  $\mu$ l of the purified protein (with a concentration  $\geq$  100  $\mu$ g/ml)  
142 was used for the analysis. Measurements were performed at a constant temperature of 23°C, at  
143 wavelengths ranging from 200-260nm (Figure 2A). In addition, measurements were taken at a  
144 constant wavelength of 222 nm with a temperature range from 20 °C to 80 °C, to examine  
145 whether elevated temperatures affected the protein structure. The results indicated that both the  
146 wild type and cys mutant proteins were folded (Figure 2A). However, we monitored differences  
147 in their stability at higher temperatures, depending on the presence or absence of the zinc-  
148 binding motif (Figure 2B). The melting curves show that both proteins remained folded at  
149 temperatures up to 65 °C (midpoint of transition state). However, the slope of transition between  
150 the folded and unfolded states was gradual with the ZnJ6 cys-mutant, unlike the wild type  
151 protein. This difference indicates reduced co-operative interactions in the mutant protein as  
152 compared to the wild type protein (Figure 2B). The stabilizing effect of the Zn binding domain  
153 was observed at higher temperatures, as the secondary structure of both proteins remained  
154 largely unaffected at optimum temperatures, regardless of the mutation in the zinc-binding motif.  
155 Thus, the cysteine-rich zinc motif was responsible for stabilization and folding of the structure at  
156 elevated temperatures.

157

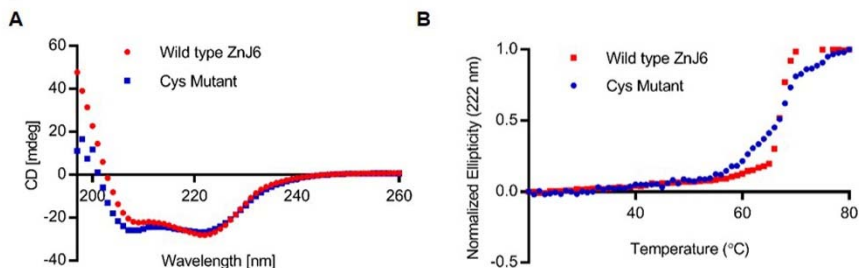

**Figure 2. Recombinant ZnJ6 and cys-mutant are folded and stable up to 65°C.** A, CD Single accumulation spectra ranging between 200-260nm was recorded for wild type ZnJ6 and its Cys-mutant at RT, to verify that the recombinant proteins are folded. B, The single wavelength melting curve was generated at a constant wavelength of 222nm at a temperature range of 20-80°C. Normalized CD melting curves of ZnJ6 and cys-mutant with relative values between 1.0 and 0.0 provide an overall comparative indication of the thermal stability of ZnJ6 and its cys-mutant. The wild type recombinant ZnJ6 shows a more coordinated structure at elevated temperatures, as indicated by the steep slope. However, both proteins have the same midpoint of the melting curve at 65°C.

## 158 **Recombinant ZnJ6 binds zinc through its cysteine-rich motif**

159 To evaluate the zinc-binding ability of cys-rich domain, the Zn binding assay using 4-(2-  
160 pyridylazo) resorcinol (PAR) and *p*-chloro-mercurybenzoate (PCMB) was performed. The assay  
161 was done using 3µM of purified recombinant proteins (ZnJ6 and cys-mutant). The addition of 30  
162 µM PCMB caused the release of the zinc atom from the protein molecule, leading to the  
163 formation of a coloured complex due to its interaction with PAR, which was measured by  
164 absorbance at 500 nm (Hunt et al, 1985). Our results (Figure 3A and 3B) show that the Zinc  
165 finger domain of the protein is required for binding Zinc. Increased absorbance in the assay that  
166 contained ZnJ6 indicated the release of coordinated zinc from the protein by PCMB, which then  
167 formed a coloured complex with PAR. The recombinant protein purified from the bacteria was  
168 analysed just after purification (without pre-incubation) and after its incubation with ZnCl<sub>2</sub> (with  
169 pre-incubation). Although zinc release was observed in both cases, there was relatively a lower  
170 release of the endogenous zinc ion if the protein was not pre-incubated with ZnCl<sub>2</sub>, since the  
171 recombinant protein purified from bacteria was not fully saturated with zinc. There was a  
172 negligible release of zinc ion from the cys-mutant, with or without pre-incubation, as it lost its  
173 coordination with zinc.

174

175 **Recombinant ZnJ6 and its cys-mutant function as chaperones that prevent thermal**  
176 **aggregation of substrate protein Citrate Synthase**

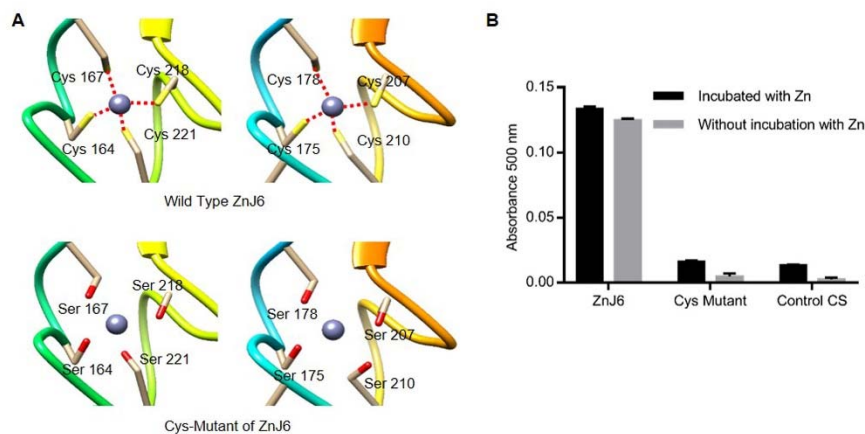

**Figure 3. The cysteine-rich motif of ZnJ6 is required for its zinc-binding activity.** **A**, The structure of the Zinc binding motif (wild type and cys-mutant) was predicted using homology modeling (constructed by UCSF Chimera). The predicted loss of coordination (red dotted lines) with zinc due to the replacement of cysteine with serine in the cys-mutant. **B**, Zinc binding activity of ZnJ6 (wild type and cys-mutant) was measured using 5  $\mu$ M of the purified recombinant proteins, either pre-incubated with 40  $\mu$ M ZnCl<sub>2</sub> to completely saturate the protein with Zn, or monitored without pre-incubation with Zn, representing the Zn binding status of the protein extracted from bacteria. The release of zinc was obtained using para-chloromercuribenzoic acid (PCMB), and the PAR -Zn<sup>+2</sup> complex that was formed was monitored at 500 nm. Citrate Synthase was used as a control.

177 To establish the whether ZnJ6 can function as a chaperone, the classical Citrate synthase (CS)  
178 assay that measures the ability of the chaperone to prevent aggregation of a temperature-sensitive  
179 protein such as CS, was performed. This assay does not monitor refolding activities. CS is highly  
180 sensitive to temperature elevation and loses its folding already at 42°C, as shown in our controls  
181 and by Buchner et al. 1998. However, the CD measurements of ZnJ6 at increasing temperatures  
182 (Figure 2B) showed that it remained folded up to 65°C. The dose-dependent chaperone effect of  
183 ZnJ6 was determined by its incubation in increasing molar ratios relative to the CS substrate  
184 (ZnJ6: CS were 0.1: 1, 1:1, 2:1, 5:1, 10:1), at 42°C for 1 h. CS aggregation was measured by  
185 monitoring OD<sub>360</sub> over time, whereby the increase in aggregation resulted in increased  
186 absorbance. The results indicate that ZnJ6 could function as a chaperone that prevented substrate  
187 aggregation, since, in the presence of ZnJ6, CS exposed to 42°C remained soluble even after 1  
188 hour, starting at a ratio of 1:1 and reaching maximum protection of 86% when mixed with ZnJ6  
189 in a 1:10 ratio. This protective activity (Figure 4), was dose-dependent. The requirement for the  
190 cysteine-rich domain in the chaperone activity was further examined by using the cys-mutant of  
191 ZnJ6. No significant difference could be recorded between the chaperone activity of the mutant  
192 and wild type ZnJ6 proteins, indicating that the ZnJ6 activity of preventing aggregation is  
193 independent of its cysteine-rich domain.



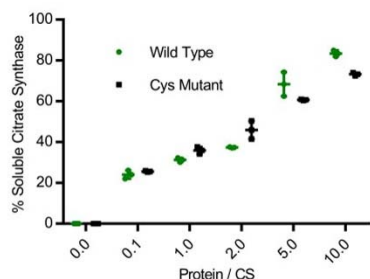

**Figure 4. ZnJ6 and its cys-mutant have holding chaperone activity, measured by the Citrate Synthase thermal aggregation assay.** Citrate synthase (CS) was diluted into a refolding mixture at 42 °C (1h) or into a refolding mixture with ZnJ6 (green circles). A parallel assay was also performed with the ZnJ6 cys- mutant (black squares). All assays were performed in the presence of increasing molar ratios as compared to CS (ZnJ6: CS; 0:1, 0.1: 1, 1:1, 2:1, 5:1, 10:1). The thermal aggregation of CS was measured by monitoring OD<sub>360</sub> over time. The absorbance was used to calculate the percentage of soluble CS after 1 h of incubation at elevated temperatures. CS that was not subjected to increased temperature served as the 100 % soluble control. CS alone incubated at 42°C for 1 h served as the fully aggregated substrate.

194

195 **ZnJ6 is unable to reduce the disulfide bonds of insulin but prevents its aggregation in a**  
196 **reducing environment**

197 The thiol-dependent activity of the protein was examined in the insulin turbidity assay (Arne,  
198 1979). Insulin contains two polypeptide chains,  $\alpha$  and  $\beta$ , that are held together by disulfide  
199 bridges. In this assay, a reducing agent such as DTT is added to the mixture, causing the  
200 disulfide bridges that hold the two polypeptide chains together to open. Once reduced and  
201 released, the  $\beta$ -subunit of insulin aggregates and its precipitation can be measured at 650 nm. In  
202 contrast to thioredoxins that accelerate precipitation of the insulin  $\beta$  chain, ZnJ6 did not have  
203 such a reducing power. However, when insulin was reduced in the presence of DTT, the addition  
204 of ZnJ6 in increasing molar concentrations relative to insulin (CS: Insulin 0:1, 0.2:1, 0.5:1 and  
205 1:1) prevented the  $\beta$  chain precipitation in a dose-dependent manner (Figure 5A). Furthermore,  
206 unlike the wild-type protein, the cys-mutant failed to prevent precipitation of the insoluble  
207 reduced insulin chain with the same efficiency (Figure 5B-C). Thus, although ZnJ6 lacked any  
208 reducing activity, it could prevent insulin chain precipitation, and the zinc-binding motif  
209 appeared to have a role during the prevention of aggregation. To further confirm the role of the  
210 cysteines in preventing the aggregation of insulin chains by ZnJ6, we monitored the amount of -  
211 SH groups with and without the Insulin substrate, using 5-dithio-bis-(2-nitrobenzoic acid)  
212 (DTNB), also known as the Ellman's reagent. DTNB binds to reduce -SH groups, forming a  
213 coloured complex that can be measured by its absorbance at 412 nm. We expected that

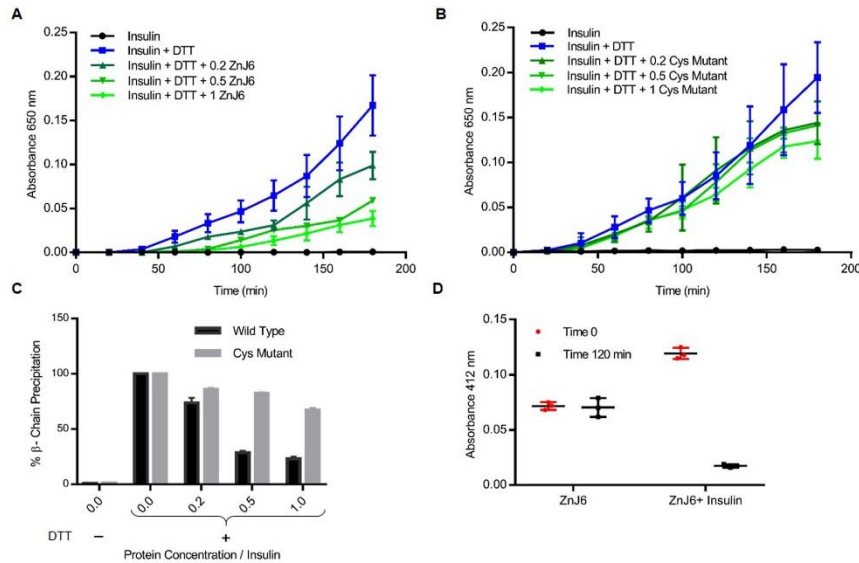

**Figure 5. The Zinc finger domain is required for preventing aggregation of the reduced insulin chain.** The Insulin turbidity assay was used to examine the thiol-dependent activity of ZnJ6. Increasing molar ratios of ZnJ6 as compared to insulin were added (0:1, 0.2:1, 0.5:1, 1:1), and precipitation of the insulin  $\beta$ -chain was measured at 650 nm, during 3 h at 25°C. A reaction containing insulin alone served as control. **A**, Precipitation was monitored in the presence of wild type recombinant ZnJ6 and **B**, its cys-mutant. **C**, Summary of end-point precipitation values obtained in the presence of different molar ratios of the ZnJ6 (black columns) and its Cys-mutant (grey columns) after 3 h. **D**, Protein-bound sulfhydryl (-SH) groups were calculated using the Ellman's test, before (red circles) and after incubation of ZnJ6 (black squares), with or without insulin, that was introduced in an equal molar ratio.

214 prevention of insulin aggregation occurred when the ZnJ6 -SH groups were occupied by the  
 215 insulin -SH groups forming disulfide bridges, thereby decreasing the total amount of -SH groups  
 216 in the solution. The amount of protein-bound SH (PB-SH) groups in the mixture was determined  
 217 before and after incubation (2 h) of recombinant ZnJ6, with and without insulin, in the presence  
 218 of 1 mM DTT. To calculate the PB-SH, first DTNB was added to the mixture, and total -SH  
 219 groups (T-SH) were measured by taking absorbance at 412 nm, [before precipitation with  
 220 Trichloroacetic acid (TCA)]. Next, a parallel mixture was TCA precipitated, centrifuged to  
 221 remove the proteins, and DTNB was added to the protein-free supernatant. This step eliminated  
 222 the effect of remaining DTT on binding to DTNB and the value obtained was NP-SH. The  
 223 difference between the T-SH and the NP-SH values gave the protein bound SH (PB-SH) groups  
 224 that was calculated before and after the 2h incubation of the different mixtures. Our results,  
 225 shown in Figure 5, indicate that the SH groups of ZnJ6 remained unchanged when ZnJ6 was  
 226 incubated alone, along with DTT. However, when ZnJ6 was incubated in the presence of Insulin  
 227 in an equal molar ratio, the amount of protein bound SH groups decreased dramatically after the  
 228 incubation with Insulin, thus supporting the formation of disulfide bridges between ZnJ6 and the  
 229 reduced Insulin chains (Figure 5D). In conclusion, ZnJ6 lacked any reducing activity by itself, as  
 230 it failed to precipitate the Insulin chain in the absence of DTT. However, it did prevent the

231 aggregation of reduced Insulin chains by forming disulfide bridges between the cys-rich motif of  
232 wild type ZnJ6 and reduced insulin chain.

233

### 234 **ZnJ6 promotes the oxidative refolding of RNase A**

235 To further investigate the thiol dependent oxidative refolding ability of ZnJ6, the oxidative  
236 refolding of reduced and denatured RNaseA (rdRNaseA) was measured in the presence of  
237 increasing molar ratios of ZnJ6. The native structure of RNaseA is stabilized by four disulfide  
238 bridges. Once these bonds are reduced, and the protein is denatured by guanidinium HCl, it loses  
239 its activity. Recovery of rdRNaseA enzymatic activity requires the native disulfide bonds to  
240 reform and to stabilize the refolded structure. Upon removal of the guanidinium HCl denaturant,  
241 the activity of rdRNaseA alone failed to regain its activity rapidly by spontaneous refolding. The  
242 reason for this failure could originate from the formation of non-native disulfide bridges and for  
243 the relatively long time required for proper refolding. However, refolding and reactivation  
244 occurred in the presence of ZnJ6 in increasing molar ratios to rdRNaseA (0:1, 0.2:1, 0.6:1 and  
245 1.2:1). The activity of rdRNaseA was restored in a gradual manner, starting from 20% when  
246 added in a 0.2:1 molar ratio and reaching up to 50% within an hour following removal of the  
247 denaturant, when ZnJ6 was added in 1.2 molar ratio to rdRNaseA, (Figure 6). Similar molar  
248 ratios of the cys-mutant showed only a minimal effect and failed to refold the RNaseA with the  
249 same efficiency. These findings indicate that ZnJ6 could assist the reformation of native  
250 disulfide bridges in the reduced and denatured RNase A, thus regaining its activity.

251

### 252 **ZnJ6 interacts with photosynthetic proteins**

253 The protein interactome plays an important role in predicting the function of target proteins. We,  
254 therefore, performed pull-down assays to examine the interacting partners of ZnJ6 that served as  
255 a bait for these assays. Since we encountered difficulties in overexpressing the SBP-tagged ZnJ6  
256 *in vivo* to a level that could support efficient affinity purification, we carried out the experiment  
257 using the recombinant protein. Recombinant SBP-tagged ZnJ6 (100  $\mu$ l, 10 $\mu$ M) was bound to a  
258 streptavidin column and further incubated with *C. reinhardtii* chloroplast extracts (4 ml, 0.1  
259  $\mu$ g/ $\mu$ l) for 2 hours. The beads were washed to remove the non-specific proteins until reaching a  
260 protein-free wash fraction (usually after washing with five column volumes). Finally, the  
261 recombinant ZnJ6-SBP bait protein was eluted with biotin, along with its interacting proteins

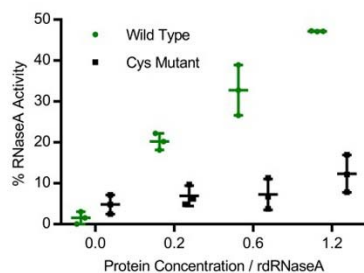

**Figure 6. ZnJ6 affects the refolding of reduced and denatured RNaseA.** Refolding of reduced and denatured RNaseA (rdRNaseA, generated using GnHCl and DTT) was initiated by its 200-fold dilution into renaturation buffer to a final concentration of 25 $\mu$ g/mL. Reactivation was conducted with and without ZnJ6, which was added in molar ratios of 0:1, 0.2:1, 0.6:1, and 1.2:1 as compared to rdRNaseA. Reactivation was monitored in the presence of the WT ZnJ6 (green circles), or its cys-mutant (black squares). Aliquots were removed at various intervals and transferred into the assay mixture, and RNaseA activity was measured by monitoring the hydrolysis of cytidine 2'3'-cyclic monophosphate at 284 nm. The points represent the final percentage of RNaseA activity as compared to native RNaseA, after 1 h of refolding.

262 (Supplemental Figure S4). Recombinant SBP-tagged MBP was used as an experimental control  
263 that was treated similarly. The eluted fractions were analyzed by mass spectrometry (MS). MS  
264 data were analysed using the MaxQuant software. Protein identification was set at less than a 1%  
265 false discovery rate. Label-free quantification (LFQ) intensities were compared among the three  
266 SBP-ZnJ6 biological repeats and the three SBP-MBP repeats with the Perseus software platform  
267 using the student t-test analysis.

268 The enrichment threshold (LFQ intensities of SBP-ZnJ6 subtracted from the SBP-MBP  
269 controls) was set to a log<sub>2</sub>-fold change  $\leq -3$  (8 fold enrichment as compared to control) with  $p <$   
270 0.05. The filtered proteins were categorized to functional groups both manually and by  
271 BLAST2GO, based on enrichment for Biological Processes. The manual categorization  
272 suggested that the ZnJ6 interacting proteins comprised of photosynthetic PSI proteins,  
273 transporters, ubiquinolins, chaperones, and chlorophyll-binding proteins (Figure 7A, 7B, and  
274 Supplemental Table 1). It is riveting that ZnJ6, unlike maize BSD2, did not interact with the  
275 highly abundant subunits of Rubisco (LS/SS) (Salesse et al., 2017)(Li et al., 2020), supporting  
276 the binding specificity between ZnJ6 and its associated proteins. A broader classification was  
277 done using BLAST2GO enrichment analysis, setting a minimum threshold of two-fold  
278 enrichment for the associated proteins, as compared to their gene abundance in the genome data  
279 set. Using this approach, we also observed the high enrichment of photosynthetic proteins in the  
280 ZnJ6 interactome, along with proteins that related to oxireductases, metabolic enzymes  
281 and transporters. The association with proteins of photosynthetic complexes supports the

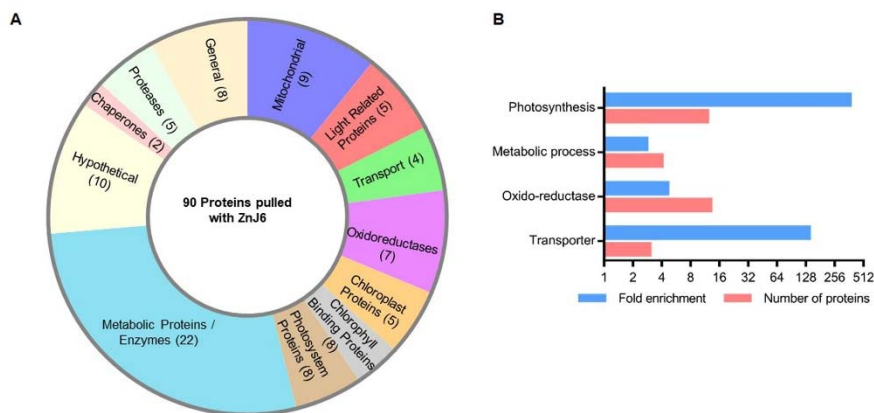

**Figure 7. Protein categories that are associated with ZnJ6 in pull-down assays.** The proteins pulled down with ZnJ6 were determined by LC-MS/MS analysis, in triplicates, and compared to control pull-down assays performed with a non-related MBP protein that was treated similarly. The proteins were identified by the MaxQuant software using Phytozome database annotations. Differences between the proteomic contents of the ZnJ6 and MBP pulled-down fractions were determined using the Perseus statistical tool. Proteins with eight-fold enrichment as compared to the control, with  $p < 0.05$ , were categorized. **A**, Manual categorization of proteins into functional groups along with their relative abundance, represented by the respective area and number of proteins (shown in brackets). The hypothetical group contains proteins with non-defined functions. **B**, BLAST2GO enrichment determined by the biological process, setting a minimum threshold of two-fold enrichment for the associated proteins as compared to their gene abundance in the genome data set.

282 possibility that ZnJ6 could have a targeted role in the assembly of such photosynthetic  
 283 complexes.

284 ***Chlamydomonas* mutant cells expressing a low level of ZnJ6 ( $\Delta$ ZnJ6) are more tolerant to**  
 285 **oxidative stress but sensitive to reductive stress**

286 As ZnJ6 is a redox-regulated chaperone, we wanted to understand how it affects the cells in  
 287 changing redox environments. For this, a *Chlamydomonas* insertional mutant expressing a low  
 288 level of ZnJ6 (CLiP mutant, LMJ.RY0402.048147) denoted  $\Delta$ ZnJ6, was examined. The  $\Delta$ ZnJ6  
 289 mutant was first confirmed using colony PCR and western analysis, using anti-ZnJ6 antibodies  
 290 (Supplemental Figure S5). To examine the effect of this mutation on growth and resistance to  
 291 different oxidizing environments, cells were grown to mid-log phase in High Salt (HS) medium,  
 292 with a light intensity of  $150 \mu\text{mol/s/m}^2$ , in the presence of paromomycin, for selective  
 293 maintenance of the mutation. The cells were exposed to different concentrations of  $\text{H}_2\text{O}_2$  (0, 2, 5,  
 294 10 and 20 mM) and MeV (0, 2, 5, 10 and 20  $\mu\text{M}$ ) for an hour. Cells were then washed, spotted  
 295 and allowed to grow on HS plates for 5 days at  $23^\circ\text{C}$ . We observed that under increased  
 296 oxidizing conditions, the mutants appeared to be more tolerant to oxidative stress than the wild  
 297 type cells. However, the wild type and  $\Delta$ ZnJ6 cells presented insignificant variations in their  
 298 growth under optimum or mild oxidizing conditions (up to 2 mM of  $\text{H}_2\text{O}_2$  and 2  $\mu\text{M}$  of MeV),  
 299 Figure 8A and 8B.

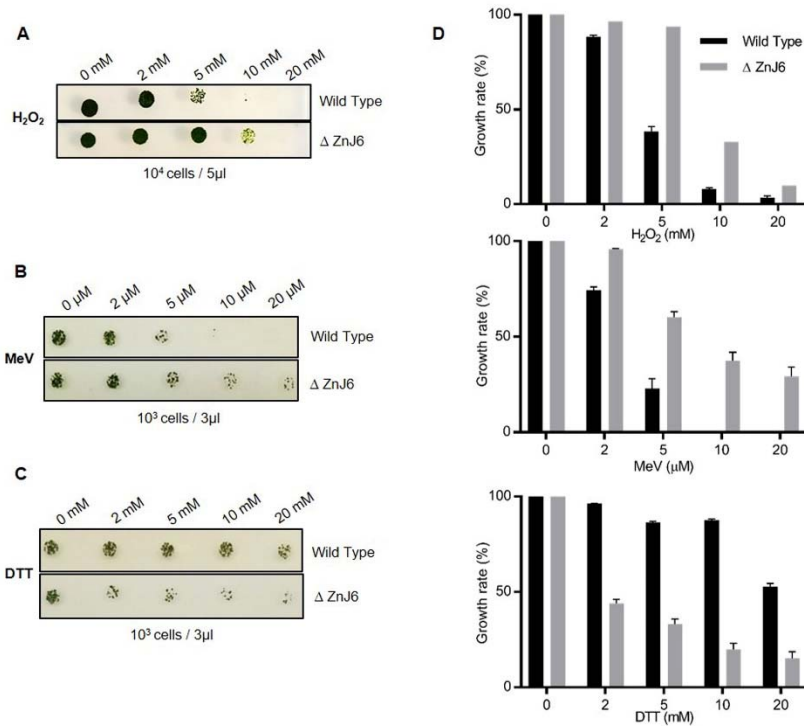

**Figure 8. ZnJ6 knock-down mutant of *C.reinhardtii* ( $\Delta$ ZnJ6) shows tolerance to oxidative stress but increased sensitivity to reducing conditions.** A, B, Wild type, and  $\Delta$ ZnJ6 cells were exposed to oxidizing conditions by incubation with increasing concentrations of H<sub>2</sub>O<sub>2</sub> and MeV for 1 hr. The cells were washed, and growth was monitored on HS plates. C, Cells were exposed to reducing conditions by incubation with DTT for 1 hr. The cells were washed, and growth was monitored by plating over HS plates. D, Growth variations of cells treated with H<sub>2</sub>O<sub>2</sub>, MeV, or DTT, as shown in panels A-C were measured using the Multi-gauge software. The growth of untreated cells served as control (100%).

300 An opposite effect was observed when the growth of the mutant cells was compared to  
 301 wild type cells under reducing conditions. Cells were treated with increasing concentrations of  
 302 DTT (0, 2, 5, 10, and 20 mM) for 2 hours, washed and spotted on HS plates, and allowed to grow  
 303 for 5 days at 23°C. While wild type cells grew well in the presence of all DTT concentrations,  
 304 growth of the mutant cells was severely compromised (Figure 8C). Growth under reducing  
 305 conditions can possibly lead to structural changes of protein, resulting in their toxic aggregation.  
 306 Since the growth of the  $\Delta$ ZnJ6 mutant was impaired in the presence of DTT as compare do wild  
 307 type cells, we assume that ZnJ6 could be involved in preventing the massive reduction caused by  
 308 DTT *in vivo*, thereby making the wild type resistant to the DTT induced stress. This hypothesis  
 309 also corroborates with our finding that ZnJ6 could prevent the aggregation of reduced insulin  
 310 chain *in vitro*.

311

312 **The ZnJ6 insertional mutant is sensitive to heat stress**

313 To further elaborate on the role of ZnJ6 during exposure of the cells to other stress conditions,  
314 the response to a commonly encountered mild heat stress was evaluated in  $\Delta$ ZnJ6. In this assay,  
315 we spotted 5  $\mu$ l of cells with increasing cell concentrations on HS plates and allowed them to  
316 grow for different time periods at 37°C (0, 1, 2, 4 h). Following this treatment, the plates were  
317 transferred back to 23°C and the cells were allowed to grow for five additional days. Figure 9A  
318 shows that exposure to the increased temperature for 2 h or more resulted in chlorophyll  
319 reduction, since the cells became yellow. Also, growth of the mutant cells was slower as  
320 compared to the wild type control. Further on, a loopful of cells taken from spots seeded with  
321  $10^5$  cells in each treatment were resuspended in 100  $\mu$ l HS media, and 5  $\mu$ l of cells were spotted  
322 on the new HS plate and allowed to grow for additional 5 days at 23°C. In this case too, the  
323 damaging effect of the temperature stress on the growth of the mutant cells continued, as growth  
324 was still impaired (Figure 9B). Image analysis, using myImageAnalysis software, also confirmed  
325 this observation. Growth of both wild type and  $\Delta$ ZnJ6 cells was reduced in response to the heat  
326 stress, as compared to their growth at 23°C, but the mutant had a significantly impaired growth  
327 as compared to wild type cells (Figure 9C, D). We concluded that ZnJ6 might assist the cells in  
328 withstanding heat stress, thus allowing continued growth.

329

330

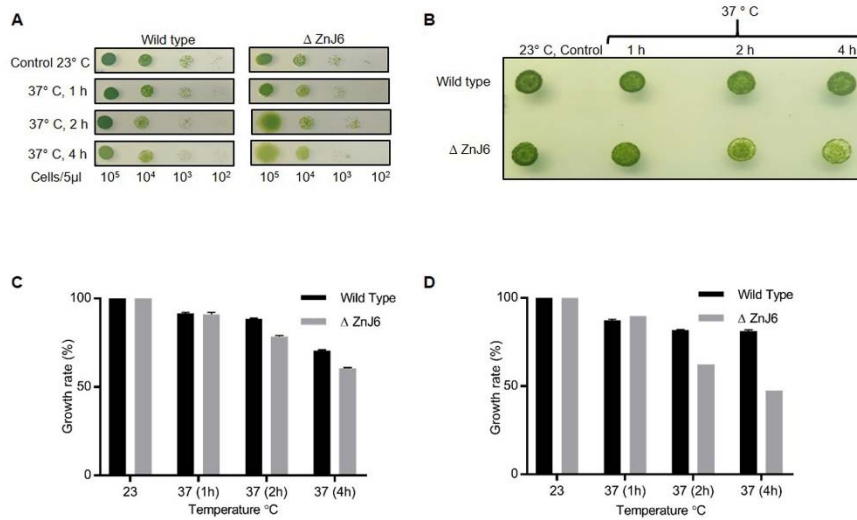

**Figure 9. ZnJ6 knock-down mutant ( $\Delta$ ZnJ6) is sensitive to temperature stress.** **A**, *Chlamydomonas* cells (wild type and  $\Delta$ ZnJ6) grown to mid-log phase in HS medium, were serially diluted. Aliquots (5 $\mu$ l) from each dilution were spotted on HS plates and incubated at 37°C for 1, 2, and 4 h. Control plates were maintained at 23°C. All the plates were then allowed to grow for 5 days under continuous illumination at 23°C. Decreased growth and an increase in yellowing of the cells is observed in  $\Delta$ ZnJ6 cells that were incubated at increased durations of heat treatments. **B**, The reduced growth of the  $\Delta$ ZnJ6 cells is maintained even in a continued growth when the cells from Panel A were further sub-cultured and replated. After 5 days of growth, a loopful of cells (1  $\mu$ l loop taken from the cells spotted at a dilution of 10<sup>5</sup> cells per 5  $\mu$ l) was resuspended in the HS media, spotted, and allowed to grow for additional 5 days at 23°C. Mutant  $\Delta$ ZnJ6 cells show reduced growth when treated at 37°C for 2-4 h. **C and D**, Densitometric analysis of the growth observed in panels A (taken from cells spotted at a dilution of 10<sup>3</sup> cells per 5  $\mu$ l) and B, respectively, were measured using myImageAnalysis (Thermo Fisher) software. The histograms were plotted after subtracting the background intensity from the measured intensity and considering the control as 100%.

## 331 DISCUSSION

332 The *C. reinhardtii* thylakoid membrane-associated DnaJ-like protein ZnJ6 (Cre06.g251716), is a  
 333 zinc finger oxidase that contains four cysteine-rich CXXCX(G)X(G) domains. These form two  
 334 C<sub>4</sub> type zinc fingers, responsible for binding Zinc. The Zinc binding domain provides a more  
 335 stable coordinated structure to the protein at elevated temperatures, as suggested by circular  
 336 dichroism. Domain prediction by the TMHMM and Phobius servers (Supplemental Figure S2)  
 337 identified a transmembrane domain in ZnJ6, thus excluding the possibility that it could serve as a  
 338 potential ortholog of BSD2 from higher plants (GRMZM2G062788\_T01) that does not have any  
 339 evidence for being a transmembrane protein. This is also supported by the association of ZnJ6  
 340 with the thylakoid membrane fraction using biochemical fractionation assays. Thus, ZnJ6  
 341 appears to be a distinct protein.

342 Zinc finger domains are known to be involved in protein-protein interactions and can  
 343 even contribute to the ability of chaperones to identify substrate proteins in their denatured state  
 344 (Szabo et al, 1996). To understand the role of the cysteine-rich motif in chaperone activities of  
 345 ZnJ6, wild type, and cys-mutant recombinant proteins were analyzed using classical *in vitro*  
 346 chaperone assays. Based on the Citrate Synthase prevention of aggregation assay, ZnJ6 is shown



347 to have a chaperone "holding activity" regardless of the mutation in the cysteine-rich domain.  
348 However, this domain was required for the redox activity of this protein. For example, ZnJ6  
349 failed to induce precipitation of the Insulin  $\beta$ -chain in the insulin turbidity assay, and this activity  
350 required the cys-rich domain. The function of the Zn-binding domain in ZnJ6 varied from that of  
351 thioredoxin (Arne, 1979) (Jeon and Ishikawa, 2002), since the latter could induce precipitation of  
352 the Insulin  $\beta$ -chains, whereas ZnJ6 could only protect these chains from precipitation, in the  
353 presence of a reducing agent such as DTT. We, therefore, concluded that ZnJ6 lacks  
354 independent reducing activity of disulphide bonds in its target proteins. Overall, this also  
355 excluded the possibility that ZnJ6 possessed protein disulphide isomerization activity (PDI).  
356 Based on the RNaseA assay, we showed that ZnJ6 has an oxidizing activity, and it assists in the  
357 native folding of reduced-denatured RNaseA (rd RNaseA). This activity was dependent on the  
358 presence of a functional Zn-binding domain. We concluded that ZnJ6 is a chaperone that can  
359 hold its target to prevent aggregation; it lacks reducing activity but can promote the disulphide-  
360 bridge formation in its target proteins.

361 Sub-cellular localization and protein interaction studies are fundamental to elucidate the  
362 mechanism and context of protein functioning (Goodin, 2018). Thus, using subcellular  
363 fractionation analysis, we identified ZnJ6 in the thylakoid membrane. This finding was found to  
364 be in agreement with the bioinformatically predicted transmembrane domain in ZnJ6. To further  
365 expand our general understanding of its context and protein interactions, we performed a pull-  
366 down assay in which we affinity-purified chloroplast extracts of *Chlamydomonas* over  
367 immobilized recombinant ZnJ6. This approach showed that ZnJ6 co-purified with the majority of  
368 photosynthetic proteins (12), oxidoreductases (13), proteases (5), and chaperones (2), suggesting  
369 that ZnJ6 could be responsible for chaperoning a multitude of substrate proteins. However, at  
370 this stage, we still cannot relate these findings to a direct interaction between these proteins and  
371 ZnJ6. The association of ZnJ6 with oxidoreductases could indicate its involvement in  
372 maintaining a subcellular redox balance, while its co-purification with photosynthetic proteins  
373 (with the majority of photosystem I proteins) could indicate its role during the assembly of the  
374 photosynthetic complex.

375 We have observed the enrichment of metabolic enzymes in the BLAST2GO analysis.  
376 This observation is in agreement with growing evidence for dual functions observed for

377 metabolic enzymes, among them RNA binding activities. Such activities could be related to their  
378 moonlighting activities, yet other explanations are offered. We previously reported that Rubisco  
379 LSU possesses RNA binding activity, which was related to its regulation under oxidizing  
380 conditions (Yosef et al., 2004). The RNA-binding activity of metabolic enzymes was recently  
381 expanded to a multitude of enzymes (Perez-Perri et al., 2018), raising interesting possibilities for  
382 such activity (Sachdeva et al., 2014).

383 To elaborate on the role of ZnJ6 in redox responses, we performed in vivo experiments  
384 monitoring the growth of the *C. reinhardtii* ZnJ6 knock-down mutant cells that expressed a low  
385 level of ZnJ6 in the different redox environment. These assays indicated that the  $\Delta$ ZNJ6 mutant  
386 cells were more tolerant to oxidative stress caused by short incubations with H<sub>2</sub>O<sub>2</sub> or MeV, as  
387 compared to wild type cells. However, the mechanism behind this activity is still unclear. A  
388 possible explanation could be that in the absence of ZnJ6, the glutathione pool was shifted to its  
389 reduced form, thus enabling a damaging reduction of target proteins that prevented their  
390 function. A similar physiological effect was reported for the FtsH5-Interacting Protein (FIP,  
391 At5g02160) in *Arabidopsis*. This protein is reported only in mosses and higher plants and is  
392 another DnaJ-like protein that lacks the typical J-domains (Lopes et al, 2018). ZnJ6 and FIP have  
393 four and two cysteine-rich motifs, respectively; and mutants of both proteins show tolerance to  
394 oxidative stress. ZnJ6 associates with an FtsH-like protease, as well as with members of the ClpP  
395 protease complex. ClpP proteases are involved in the maintenance of chloroplast protein  
396 homeostasis (Adam et al., 2006) (Nishimura and Van Wijk, 2015). Also, chloroplast chaperones  
397 are known to regulate protease activities and function in synergy to maintain protein quality  
398 control (Nishimura et al, 2017). Therefore ZnJ6 could be involved in protein quality control and  
399 in regulating protein homeostasis.

400 In contrast to the improved growth of the  $\Delta$ ZNJ6 mutant cells under oxidizing conditions,  
401 these cells were more sensitive to a reducing force induced by DTT, showing impaired growth as  
402 compared to wild type cells. We assume that in the presence of DTT, protein structures may be  
403 affected due to the reduction of disulfide bridges, as these are required to stabilize proteins,  
404 among them also those involved in photosynthesis. Thus, the oxidizing activity of ZnJ6 could  
405 recover disulfide bridge formation, thus protecting protein structures in the wild type cells. In its  
406 absence, the reductive force of DTT could impair protein structures, possibly also leading to their

407 aggregation. Thereby, ZnJ6 could provide resistance to the wild type cells against DTT induced  
408 stress. The *in vitro* insulin aggregation assay also supports the observation.

409 It was earlier shown that shifting *Chlamydomonas* cells from 25°C to 37°C induced a heat  
410 stress response (HSR) (Schroda et al., 2015). Our data suggest that ZnJ6 is involved in protection  
411 against a heat stress, since exposure of the  $\Delta$ ZNJ6 mutant cells to elevated temperatures for 2-4  
412 hours resulted in degradation of chlorophyll and impaired growth. Thus the mutant cells  
413 appeared to be sensitive to heat stress (37°C) much more than the wild type cells, possibly  
414 highlighting the importance of the chaperone activity of ZnJ6 under a temperature stress. This is  
415 further supported by the finding that ZnJ6 was found to interact with ClpP proteases that are  
416 involved in chloroplast unfolded protein response, UPR and in proteostasis processes (Ramundo  
417 et al., 2014). The ability of ZnJ6 to protect a substrate protein from heat induced aggregation was  
418 shown *in vitro* in the CS assays. Its structure is also stable up to 65°C, enabling such activity.  
419 ZnJ6 was also shown to interact with the temperature-sensitive catalytic chaperone Rubisco  
420 activase in the pull-down assay. This could suggest that it has a role in the prevention of  
421 irreversible aggregation of temperature-sensitive proteins in the chloroplast.

## 422 CONCLUSION

423 Here we show that ZnJ6 is a chaperone that in addition to its ability to prevent aggregation of  
424 misfolded substrate proteins, possesses an oxidizing activity that can restore reduced disulfide  
425 bridges, thus stabilizing protein structure. We therefore suggest that ZnJ6 assists in maintaining  
426 the redox balance in the chloroplast. ZnJ6 is a thylakoid membrane protein, shown to interact  
427 with photosystem complexes. As shown for other DnaJ-like proteins such as PSA2 (Fristedt et  
428 al., 2014) and LQY1 (Lu et al., 2011), ZnJ6 could also be involved in similar assembly  
429 processes, although its localization in the thylakoid membranes could restrict its function to  
430 complexes that are formed in the membranes. Alternatively, ZnJ6 could also affect the  
431 biosynthesis of thylakoid membrane components, as these are also coordinated with the  
432 photosynthetic machinery (Bohne et al., 2013). Further studies are required to deepen our  
433 understanding of ZnJ6 function and role during different stresses.

434

## 435 MATERIAL AND METHODS

### 436 Isolation of RNA, cDNA synthesis and cloning

437 Early log-phase cells ( $OD_{750} = 0.25-0.35$ ,  $2 \times 10^6$  cells/ml) were used to isolate total RNA by  
438 using TRI Reagent (Sigma) protocol. The cDNA was synthesized using High capacity cDNA  
439 reverse transcription protocol (Applied Biosystems) with 1  $\mu$ g RNA as a template. Bacterial  
440 clones for recombinant protein expression were generated as described in the supplemental  
441 methods section and the primers used were mentioned in supplementale tables 2 and 3.

442

### 443 *Chlamydomonas* strains and Growth Conditions

444 *Chlamydomonas* strains (cc-125 and cc-4533) were grown and maintained on TAP plates at  
445 23°C. The knock-down ZnJ6 CLiP mutant LMJ.RY0402.048147 ( $\Delta$ ZnJ6) was obtained from the  
446 *Chlamydomonas* Resource Center (Li et al, 2019). The knock-down mutant was maintained over  
447 10  $\mu$ g/ml Paramomycin in Tris-acetate-phosphate (TAP) plates and verified by colony PCR  
448 followed by western analysis. The fresh colony was first inoculated in 10ml TAP media with  
449 required antibiotics followed by large scale culturing in High Salt (HS) or TAP media (as per  
450 requirement), with 12 h dark/light cycles (at 150  $\mu$ mol/s/m<sup>2</sup>) and constant rotary shaking at 100  
451 rpm.

452

### 453 Recombinant protein purification

454 An overnight bacterial stater culture (10 ml) in LB medium supplemented with 100  $\mu$ g/ml  
455 ampicillin and 25  $\mu$ g/ml chloramphenicol (for rosetta strain only) was inoculated into 1 L of LB,  
456 supplemented with required antibiotics and 1% glucose. Expression of the SBP-tagged pMBP-  
457 GB1-ZnJ6 (see supplemental methods) was induced upon the addition of 0.2 mM IPTG when  
458 cells reached  $OD_{600} = 0.5-0.7$ , at 20°C for 16 h. The culture was harvested and resuspended in  
459 lysis buffer (20 mM Tris-HCl, pH 7.4, 200 mM NaCl, 1 mM EDTA) containing 0.1% Brij 58,  
460 Sigma Aldrich, a protease inhibitor (PI) cocktail, and 5  $\mu$ g/ml DNaseI. The cells were disrupted  
461 in a French Press at 1500 psi and centrifuged at 45,000 rpm (Beckman 70 Ti rotor). The  
462 supernatant was loaded onto an amylose column (NEB). After washing the column with 5  
463 column volumes of lysis buffer, ZnJ6 was eluted with 10 mM maltose in the same buffer. Next,

464 the protein was cleaved using the TEV protease, to remove the MBP tag. The SBP tagged  
465 cleaved protein was purified again over the streptavidin-Sepharose (A2S) column. Protein  
466 concentration was estimated using the BCA protein assay kit (Thermo scientific). The the SBP-  
467 tagged cys- mutant and MBP proteins were purified similarly. Elution fractions were analysed on  
468 15% SDS-PAGE (Supplemental figure S3).

469

#### 470 **Subcellular fractionation of Cytoplasmic and chloroplast fractions**

471 Mid-log cells (1L) were harvested and disrupted by nitrogen cavitation in a Yeda Press Cell  
472 Disruptor at approximately 100 PSI. The disrupted cells were centrifuged at 2000g in Corex  
473 glass tubes. The supernatant contained the cytoplasmic fraction. The pellets were resuspended in  
474 6 ml of Percoll buffer (330 mM Sorbitol, 1 mM MgCl<sub>2</sub>, 20 mM NaCl, 2 mM EDTA, 1 mM  
475 MnCl<sub>2</sub>, 2 mM NaNO<sub>3</sub>, 5 mM Na-ascorbate and 50 mM HEPES, pH 7.6). A sample of 5ml was  
476 loaded over a 45/70% Percoll step gradient, which was centrifuged at 20,000g for 10 min at 4°C  
477 in a SW40 rotor. The intact chloroplasts were collected from the interphase of the step gradient.  
478 The efficiency of the chloroplast isolation was determined by measuring the chlorophyll content  
479 in the purified fractions.

480 The subcellular fractions were verified by western blot analysis using gels loaded with  
481 equal protein quantities. Antibodies against organelle-specific proteins were used to verify the  
482 subcellular fractions. These targeted the Rubisco small subunit (rbcS) and the 33-kDa oxygen-  
483 evolving enzyme (OEE33) as chloroplast markers, HSP70A as a cytoplasmic marker. Antibodies  
484 against the 32 kDa psbA which encodes for the D1 protein of photosystem II served as a marker  
485 for the chloroplast and its thylakoids. Antibodies against the recombinant ZnJ6 fragment 1-165  
486 are described in Supplemental Figure S1.

487

#### 488 **Separation of the membrane and soluble protein fraction**

489 *Chlamydomonas* cells (250 ml) were grown, pelleted as above, and resuspended in 10 ml, 25  
490 mM HEPES-KOH, pH 7.5, 5 mM MgCl<sub>2</sub>, 0.3 M (10.2%) sucrose with PI. The resuspended  
491 pellet was then disrupted with the Yeda Press apparatus at 500 PSI. Membrane and soluble  
492 fractions were separated by centrifugation at 100,000 g for 1 h at 4°C. The soluble proteins were  
493 precipitated using 20% TCA (final concentration) for 1h at 4°C and washed twice with 100%

494 acetone. Pellets of both soluble and membrane proteins were dissolved in 40 mM Tris-HCl pH  
495 7.4, 5 mM EDTA, 4% SDS (Wittkopp et al, 2018).

496

#### 497 **Isolation of Thylakoid membranes**

498 Thylakoid membranes were isolated by harvesting a 250 ml culture of mid-log cells grown as  
499 described above. Cells were pelleted at 4500g for 10min at 4°C and resuspended in 25 mM  
500 HEPES-KOH, pH 7.5, 5 mM MgCl<sub>2</sub>, and 0.3 M sucrose supplemented with a cocktail of a PIs.  
501 Cells were disrupted using nitrogen cavitation in the Yeda Press Cell Disruptor at 500 PSI and  
502 centrifuged at 2,316g (10 min, 4°C), to separate between the membrane and soluble fractions.  
503 The pellet was resuspended in 5 mM HEPES-KOH, pH 7.5, 10 mM EDTA, 0.3 M sucrose, and a  
504 cocktail of PIs, followed by centrifugation at 68,600 g for 20min at 4°C. The resulting pellet was  
505 resuspended in 5ml, 5 mM HEPES-KOH, pH 7.5, 10 mM EDTA, 1.8 M sucrose, and a mix of  
506 protease inhibitors. The resuspended sample (at the bottom of the tube) was carefully overlaid  
507 with 2 ml 5 mM HEPES-KOH, pH 7.5, 1.3 M sucrose, 10 mM EDTA, and then 5 ml, 5 mM  
508 HEPES-KOH, pH 7.5, 0.5 M sucrose. The thylakoid membranes were then centrifuged at  
509 247,605 g for 1 h at 4°C. The Thylakoid membranes were collected from the interface between  
510 the fractions containing 1.8 M and 1.3 M sucrose in the above-mentioned gradient. The thylakoid  
511 membranes were spun down at 68,600 g for 20 min at 4°C and washed twice with a buffer  
512 containing 5 mM HEPES-KOH, pH 7.5, 10 mM EDTA, and a cocktail of PIs. The thylakoid  
513 pellet was resuspended in 200 µl of the same buffer (Takahashi et al., 2006)

514

#### 515 **Circular Dichroism and Melting Curves**

516 Circular dichroism measurements were done using a spectropolarimeter (JASCO J-815) with 1  
517 mm optical pass cuvette (Hellma). The purified recombinant proteins (100 µl) were at a  
518 concentration  $\geq 100$  µg/ml in Tris buffer, pH 7.5, and loaded into the clean cuvette. Single  
519 accumulation spectra ranging between 200-260 nm were recorded at RT. Scanning speed was set  
520 to 5 nm/min, with 6 sec response time and 1 nm bandwidth. Buffer blank (20 mM Tris, 10 mM  
521 NaCl, pH 7.5) without protein served as a control for the experiment. Spectra were baseline  
522 corrected by subtracting a blank spectrum.

523

524 Melting curves were monitored using the same conditions and buffer. The single  
525 wavelength melting curve was generated at a constant wavelength of 222 nm with a temperature  
526 range (20-80°C). The CD Tool software was used to produce principal component analyses  
527 (PCA) for each sample. The two main components in the PCA analyses corresponded to spectra  
528 of folded and unfolded structures, and their magnitudes were plotted as a function of  
529 temperature, providing an overall indication of the thermal stability of the protein (CD,  
530 biopolymer).

531

### 532 **The PAR-PCMB Zn-Binding Assay**

533 Zn binding by ZnJ6 was determined using the PAR-PCMB assay, as previously described (Hunt  
534 et al, 1985), except that the thiol bound zinc was released with para-chloromercuribenzoic acid  
535 (PCMB). Zinc release was measured by its interaction with 4- (2-Pyridylazo) resorcinol (PAR) at  
536 500 nm and compared to a ZnCl<sub>2</sub> standard curve. Metal-free buffers were used throughout the  
537 assay, following treatment with Chelex 100 resin (5 gr in 40 mM KH<sub>2</sub>PO<sub>4</sub>, pH 7.5), for 1 h at  
538 37°C. ZnJ6 (3 μM) was mixed with 0.1 mM PAR in 40 mM KH<sub>2</sub>PO<sub>4</sub> buffer to measure any free  
539 or loosely bound zinc in the solution. Addition of 30 μM PCMB to the protein solution (1 ml)  
540 caused immediate zinc release and allowed the determination and calculation of the total amount  
541 of bound Zinc per ZnJ6 molecule. PAR in buffer KH<sub>2</sub>PO<sub>4</sub> was used as blank.

542

### 543 **Citrate Synthase assay**

544 The ability to prevent aggregation of heat-sensitive proteins was tested using the Citrate  
545 Synthase assay, which monitors the holding activity of potential chaperones. ZnJ6 was added in  
546 increasing molar ratios (CS:ZnJ6, 1:0.1, 1:1, 1:2, 1:5, 1:10) to Citrate Synthase (CS) in 50 mM  
547 Tris pH 8.0 and 2 mM EDTA. CS, 12 μM is denatured by exposure to thermal stress (42°C) in a  
548 96 well plate, containing 200 μl reaction volume in each well. The activity of ZnJ6 was  
549 measured by monitoring OD<sub>360</sub> for an hour in a plate reader (BioTek Instruments, Winoosky).

550

### 551 **Insulin (β-chain) aggregation assay**

552 The thiol-dependent activity of ZnJ6 was examined using the insulin turbidity assay (Arne,  
553 1979). ZnJ6 and its cys-mutant were added to an Insulin in increasing molar ratios (ZnJ6:  
554 Insulin, 0.2:1, 0.5:1, 1:1) solution of 32 μM bovine insulin (diluted from a stock of 1.7 mM) in a

555 freshly prepared buffer containing 0.1 M potassium phosphate (pH 7.0) and 2 mM EDTA (100  
556  $\mu$ L). The reaction was initiated by the addition of freshly prepared DTT to final concentration of  
557 1 mM at 25°C. A reaction mix containing insulin alone served as control. Precipitation of the  
558 insulin  $\beta$ -chain was measured at 650 nm during 2 h, in a 96 well plate.

#### 559 **Ellman's test for determination of protein-bound sulfhydryl (PB-SH) groups**

560 This test is used to calculate the sulfhydryl (-SH) group bound to a protein in the reaction mix.  
561 ZnJ6 was added to bovine insulin in the equimolar ratio; ZnJ6 alone served as control. One mM  
562 DTT was added to the solution to reduce the Insulin, as described above. The amount of PB-SH  
563 in the reaction mix was calculated before and after incubation of two hours. In order to quantify  
564 the PB-SH, non-protein bound -SH was subtracted from total-SH to quantify the -SH group  
565 present in the protein (Sedlak and Lindsay, 1968). Total-SH groups were quantified by adding 50  
566  $\mu$ L of reaction sample in 950  $\mu$ L DTNB reagent (0.1 mM DTNB, 2.5 mM sodium acetate and  
567 100 mM Tris, pH8). Non-protein bound -SH was measured by taking measurements after TCA  
568 precipitation. The mix was incubated for 5 min at room temperature, followed by measuring  
569 absorbance at 412 nm.

570

#### 571 **Reduced and Denatured RNaseA Refolding Assay**

572 Reduced and denatured RNaseA (rdRNaseA) was prepared by overnight incubation of the native  
573 enzyme (20 mg/ml) in 500  $\mu$ l of 0.1 M Tris-HCl pH 8.6, containing 150 mM DTT and 6 M  
574 guanidinium hydrochloride). Excess DTT and guanidinium hydrochloride were separated from  
575 the rdRNaseA using a Sephadex G-25 buffer replacement column, equilibrated with 10 mM HCl.  
576 RNaseA aliquots (10 mg/ml stock) were stored at -80°C. Reactivation of Reduced and Denatured  
577 RNaseA was initiated by 200-fold dilution of the protein (to a final concentration of 50  $\mu$ g/mL  
578 (3.8  $\mu$ M) in 1mL of reactivation buffer (0.1 M Tris-HCl pH 7.0, 0.1 M NaCl and 1 mM EDTA).  
579 The refolding was performed in the absence, or presence of, at increasing molar ratios (ZnJ6:  
580 rdRNaseA, 0.2:1, 0.6:1, and 1.2:1). Aliquots (50  $\mu$ L) were removed at various intervals and  
581 mixed with 50  $\mu$ L of the assay mixture containing 0.1 M Tris- HCl pH 7.2, 0.1 M NaCl and 0.3  
582 mg/ml cytidine 2', 3'-cyclic monophosphate. RNaseA activity was measured by monitoring the  
583 hydrolysis of cytidine 2':3'-cyclic monophosphate at 284 nm. The hydrolysis was calculated as  
584 the difference between OD<sub>284</sub> at t = 0 min and t = 10 min. Refolding was presented as a



585 percentage hydrolysis of treated samples compared to the hydrolysis of native RNaseA (Doron et  
586 al, 2018).

587

### 588 **Analysis of proteins that associate with ZnJ6 by pull-down experiments**

589 Recombinant ZnJ6 fused to an SBP tag (100  $\mu$ l, 10  $\mu$ M) was affinity purified over streptavidin-  
590 Sepharose resin (A2S). Chloroplasts (4 ml, 0.1  $\mu$ g/ $\mu$ l) were isolated and solubilized on ice for  
591 5min using 1%  $\beta$ -DDM (n-Dodecyl  $\beta$ -D-maltoside, Sigma) in a buffer containing 0.7 M Sucrose,  
592 0.1 M Tris-HCl, 0.3 M NaCl, pH 7.5 and a cocktail of PIs (Sigma). The sample was centrifuged  
593 for 40 min at 40,000 g and the soluble protein fraction was collected, diluted 1:10 in the buffer  
594 (20 mM Tris-HCl, pH 7.4, 200 mM NaCl, 1 mM EDTA), and loaded onto the streptavidin-  
595 Sepharose beads (200  $\mu$ l) following their incubation with the recombinant the ZnJ6 protein. The  
596 mixture was incubated at 4°C for 2 h. The beads were then washed with 5 column volumes of the  
597 buffer (pH 7.4) to remove non-specific proteins. Finally, the bound protein with its associated  
598 complex were eluted using 2 mM biotin. SBP-tagged MBP treated similarly served as control for  
599 non-specific binding of proteins to the beads.

600

### 601 **Mass Spectrometry (MS)**

602 The gel lane containing the proteins that were co-eluted from the streptavidin-Sepharose column  
603 were extracted from the gel and further reduced using 3 mM DTT (60°C for 30 min), followed  
604 by modification with 10 mM iodoacetamide in 100 mM ammonium bicarbonate for 30 min  
605 at 25°C. The sample was subsequently treated with trypsin (Promega), and digested overnight at  
606 37°C in 10 mM ammonium bicarbonate. Digested peptides were desalted, dried, resuspended in  
607 formic acid (0.1 %) and resolved by reverse phase chromatography over a 30 min linear gradient  
608 with 5% to 35% acetonitrile and 0.1 % formic acid in the water, a 15 min gradient with 35% to  
609 95% acetonitrile and 0.1 % formic acid in water and a 15 min gradient at 95% acetonitrile and  
610 0.1 % formic acid in water at a flow rate of 0.15  $\mu$ l/min. Mass spectrometry was performed using  
611 Q-Exactive Plus mass spectrometer (Thermo) in the positive mode set to conduct a repetitively  
612 full MS scan along with high energy collision dissociation of the 10 dominant ions selected from  
613 the first MS scan. A mass tolerance of 10 ppm for precursor masses and 20 ppm for fragment  
614 ions was set. All analyses were performed in triplicates. The MS analyses were performed in the  
615 Smoler Center in the Technion.

616

## 617 **Statistical analysis**

618 Raw mass spectrometric data were analysed using the MaxQuant software, version 1.5.2.8. The  
619 data were searched against *C.reinhardtii* proteins listed in the Phytozome database. Protein  
620 identification was set at less than a 1% false discovery rate. The MaxQuant settings selected  
621 were a minimum of 1 razor/unique peptide for identification, a minimum peptide length of six  
622 amino acids, and a maximum of two mis-cleavages. For protein quantification, summed peptide  
623 intensities were used. Missing intensities from the analyses were substituted with values close to  
624 baseline only if the values were present in the corresponding analysed sample. LFQ intensities  
625 were compared among the three SBP-ZnJ6 biological repeats and the three SBP-MBP repeats on  
626 the Perseus software platform using the student t test.

627 The enrichment threshold (LFQ intensity of SBP-ZnJ6 subtracted from SBP-MBP  
628 control) was set to a log<sub>2</sub>-fold change  $\leq -3$  (8 fold enrichment as compared to control) and p-  
629 value  $< 0.05$ . The filtered proteins were categorised both manually, based on their function in the  
630 Phytozome database, and using BLAST2GO software based on the biological process (with a  
631 minimum of 2 fold enrichment) as selected criteria. The minor categories (sub-branches) with the  
632 BLAST2GO software were merged to get the four broader classes (photosynthesis, metabolic  
633 process, oxidoreductases, and transporters)

634

## 635 **Redox sensitivity of *Chlamydomonas* cells by their exposure to H<sub>2</sub>O<sub>2</sub>, MeV or DTT**

636 To verify the *in vivo* function of ZnJ6, the insertional knock-down mutant with the paromomycin  
637 resistance was used. *C. reinhardtii* cells (mutant, wild type background cells) were grown to  
638 mid-log phase in HS medium with light intensity of 150  $\mu\text{mol/s/m}^2$ . The mutant was confirmed  
639 by PCR and western analysis using anti- ZnJ6 antibodies. For all the treatments,  $\sim 1 \times 10^7$  cells  
640  $\text{ml}^{-1}$  (1 ml) were exposed to different concentrations of H<sub>2</sub>O<sub>2</sub> (2, 5, 10, and 20 mM), MeV (2, 5,  
641 10, and 20  $\mu\text{M}$ ) and DTT (2, 5, 10 and 20 mM). After exposure, the cells were washed twice and  
642 resuspended in HS media with required dilution.  $10^3$  cells (3  $\mu\text{l}$ ) were seeded over HS plates and  
643 allowed to grow at 23°C. Pictures were taken on day 5 of the growth and analysed using the  
644 MultiGauge software.

645

646

647 **Exposure of *Chlamydomonas* cells to heat stress**

648 *C. reinhardtii* cells (mutant, wild type background cells) were grown as explained earlier (in  
649 *Chlamydomonas* strains and Growth Condition section). 5  $\mu$ l (serially diluted from  $10^5$  to  $10^2$   
650 cells/ 5  $\mu$ l) aliquots were spotted on the HS plates and incubated at 23 °C (control) or exposed to  
651 heat stress by incubating the plates at 37 °C for 1, 2, and 4 h. Plates were then returned to 23°C  
652 and allowed to grow for an additional 5 days. A loop full (1  $\mu$ l inoculation loop) of cells from  
653  $10^5$  cell lane was then taken and resuspended in 100  $\mu$ l of HS media, 5  $\mu$ l of cells were spotted  
654 on a new plate and allowed to further grow at 23°C for another 5 days to check the growth rate.

655

656 **Supplemental Data**

657 **Supplemental Table S1.** Mass spectrometry analysis of pulled down proteins.

658 **Supplemental Table S2.** Primers for recombinant protein expression.

659 **Supplemental Table S3.** Primers for Cysteine to Serine (TGC > TCC) mutagenesis of ZnJ6.

660 **Supplemental Methods-** Cloning for recombinant protein expression.

661 **Supplemental Figure S1.** ZnJ6 antibody generation.

662 **Supplemental Figure S2.** Prediction of the transmembrane domain of ZnJ6

663 **Supplemental Figure S3.** Purified recombinant protein run on SDS-PAGE

664 **Supplemental Figure S4.** Percoll two-step gradient for chloroplast isolation and schematic  
665 representation of pull-down experiment along with anti- SBP western analysis of different pull-  
666 down fractions.

667 **Supplemental Figure S5.** Characterization and verification of CLiP mutant  
668 LMJ.RY0402.048147.

669

670 **ACKNOWLEDGEMENTS**

671 We are grateful to Prof. Zach Adam for antibodies against OEE33 and Moshe Sagi for antibodies  
672 against psbA. The GB1 tag for protein stability was obtained from Prof. Gerhard Wagner. We  
673 thank Prof. Dudy Bar-Zvi, Prof. Ofer Yifrach and Prof. Michele Zaccai for valuable comments.  
674 We also thank Dr. Lior Doron, Dr. Naama Segal, Dr. Irit Dahan, Nofar Baron, for helpful  
675 discussions, and Dr. Matan Drory for helping with BLAST2GO enrichment analysis.

676 **FIGURE LEGENDS**

677 **Figure 1. ZnJ6 is localized in the thylakoid membrane of the chloroplast.** *C. reinhardtii* cells  
678 were grown until the late log phase and disrupted by nitrogen cavitation and further  
679 subfractionated. **A**, The purified chloroplasts, cytoplasm, and total proteins were subjected to  
680 western analysis using antibodies against OEE33 as a chloroplast marker and HSP70A as a  
681 cytoplasmic marker. **B**, The membrane and soluble fractions of *C. reinhardtii* cells were  
682 separated, and the presence of ZnJ6 in the membrane fraction was confirmed. psbA served as a  
683 membrane marker, and Rubisco Activase (RA) was is a marker that is distributed between the  
684 membrane and soluble fractions. **C**, Thylakoid membranes were isolated using a sucrose step  
685 gradient. Samples taken from the total extracts, cytoplasm, chloroplast, and thylakoid fractions  
686 were subjected to western analysis using antibodies against psbA as a thylakoid marker, rbcS as  
687 chloroplast markers, and HSP70A served as a cytoplasmic marker. Antibodies ZnJ6 specific  
688 antibodies unveiled its presence in the thylakoid membrane.

689

690 **Figure 2. Recombinant ZnJ6 and cys-mutant are folded and stable up to 65°C.** **A**, CD  
691 Single accumulation spectra ranging between 200-260nm was recorded for wild type ZnJ6 and  
692 its Cys-mutant at RT, to verify that the recombinant proteins are folded. **B**, The single  
693 wavelength melting curve was generated at a constant wavelength of 222nm at a temperature  
694 range of 20-80°C. Normalized CD melting curves of ZnJ6 and cys-mutant with relative values  
695 between 1.0 and 0.0 provide an overall comparative indication of the thermal stability of ZnJ6  
696 and its cys-mutant. The wild type recombinant ZnJ6 shows a more coordinated structure at  
697 elevated temperatures, as indicated by the steep slope. However, both proteins have the same  
698 midpoint of the melting curve at 65°C.

699

700 **Figure 3. The cysteine-rich motif of ZnJ6 is required for its zinc-binding activity.** **A**, The  
701 structure of the Zinc binding motif (wild type and cys-mutant) was predicted using homology  
702 modeling (constructed by UCSF Chimera). The predicted loss of coordination (red dotted lines)  
703 with zinc due to the replacement of cysteine with serine in the cys-mutant. **B**, Zinc binding  
704 activity of ZnJ6 (wild type and cys-mutant) was measured using 5  $\mu$ M of the purified

705 recombinant proteins, either pre-incubated with 40  $\mu\text{M}$   $\text{ZnCl}_2$  to completely saturate the protein  
706 with Zn, or monitored without pre-incubation with Zn, representing the Zn binding status of the  
707 protein extracted from bacteria. The release of zinc was obtained using para-  
708 chloromercuribenzoic acid (PCMB), and the PAR  $-\text{Zn}^{+2}$  complex that was formed was  
709 monitored at 500 nm. Citrate Synthase was used as a control.

710

711 **Figure 4. ZnJ6 and its cys-mutant have holding chaperone activity, measured by the**  
712 **Citrate Synthase thermal aggregation assay.** Citrate synthase (CS) was diluted into a refolding  
713 mixture at 42 °C (1h) or into a refolding mixture with ZnJ6 (green circles). A parallel assay was  
714 also performed with the ZnJ6 cys- mutant (black squares). All assays were performed in the  
715 presence of increasing molar ratios as compared to CS (ZnJ6: CS; 0:1, 0.1: 1, 1:1, 2:1, 5:1, 10:1).  
716 The thermal aggregation of CS was measured by monitoring OD<sub>360</sub> over time. The absorbance  
717 was used to calculate the percentage of soluble CS after 1 h of incubation at elevated  
718 temperatures. CS that was not subjected to increased temperature served as the 100 % soluble  
719 control. CS alone incubated at 42°C for 1 h served as the fully aggregated substrate.

720

721 **Figure 5. The Zinc finger domain is required for preventing aggregation of the reduced**  
722 **insulin chain.** The Insulin turbidity assay was used to examine the thiol-dependent activity of  
723 ZnJ6. Increasing molar ratios of ZnJ6 as compared to insulin were added (0:1, 0.2:1, 0.5:1, 1:1),  
724 and precipitation of the insulin  $\beta$ -chain was measured at 650 nm, during 3 h at 25°C. A reaction  
725 containing insulin alone served as control. **A**, Precipitation was monitored in the presence of  
726 wild type recombinant ZnJ6 and **B**, its cys-mutant. **C**, Summary of end-point precipitation  
727 values obtained in the presence of different molar ratios of the ZnJ6 (black columns) and its Cys-  
728 mutant (grey columns) after 3 h. **D**, Protein-bound sulfhydryl (-SH) groups were calculated using  
729 the Ellman's test, before (red circles) and after incubation of ZnJ6 (black squares), with or  
730 without insulin, that was introduced in an equal molar ratio.

731

732 **Figure 6. ZnJ6 affects the refolding of reduced and denatured RNaseA.** Refolding of reduced  
733 and denatured RNaseA (rdRNaseA, generated using  $\text{GnHCl}$  and DTT) was initiated by its 200-

734 fold dilution into renaturation buffer to a final concentration of 25 $\mu$ g/mL. Reactivation was  
735 conducted with and without ZnJ6, which was added in molar ratios of 0:1, 0.2:1, 0.6:1, and 1.2:1  
736 as compared to rdRNaseA. Reactivation was monitored in the presence of the WT ZnJ6 (green  
737 circles), or its cys-mutant (black squares). Aliquots were removed at various intervals and  
738 transferred into the assay mixture, and RNaseA activity was measured by monitoring the  
739 hydrolysis of cytidine 2'3'-cyclic monophosphate at 284 nm. The points represent the final  
740 percentage of RNaseA activity as compared to native RNaseA, after 1 h of refolding.

741

742 **Figure 7. Protein categories that are associated with ZnJ6 in pull-down assays.** The proteins  
743 pulled down with ZnJ6 were determined by LC-MS/MS analysis, in triplicates, and compared to  
744 control pull-down assays performed with a non-related MBP protein that was treated similarly.  
745 The proteins were identified by the MaxQuant software using Phytozome database annotations.  
746 Differences between the proteomic contents of the ZnJ6 and MBP pulled-down fractions were  
747 determined using the Perseus statistical tool. Proteins with eight-fold enrichment as compared to  
748 the control, with  $p < 0.05$ , were categorized. **A**, Manual categorization of proteins into functional  
749 groups along with their relative abundance, represented by the respective area and number of  
750 proteins (shown in brackets). The hypothetical group contains proteins with non-defined  
751 functions. **B**, BLAST2GO enrichment determined by the biological process, setting a minimum  
752 threshold of two-fold enrichment for the associated proteins as compared to their gene  
753 abundance in the genome data set.

754

755 **Figure 8. ZnJ6 knock-down mutant of *C.reinhardtii* ( $\Delta$ ZnJ6) shows tolerance to oxidative**  
756 **stress but increased sensitivity to reducing conditions.** **A, B**, Wild type, and  $\Delta$ ZnJ6 cells were  
757 exposed to oxidizing conditions by incubation with increasing concentrations of H<sub>2</sub>O<sub>2</sub> and MeV  
758 for 1 hr. The cells were washed, and growth was monitored on HS plates. **C**, Cells were exposed  
759 to reducing conditions by incubation with DTT for 1 hr. The cells were washed, and growth was  
760 monitored by plating over HS plates. **D**, Growth variations of cells treated with H<sub>2</sub>O<sub>2</sub>, MeV, or  
761 DTT, as shown in panels A-C were measured using the Multi-gauge software. The growth of  
762 untreated cells served as control (100%).

763

764 **Figure 9. ZnJ6 knock-down mutant ( $\Delta$ ZnJ6) is sensitive to temperature stress. A,**  
765 *Chlamydomonas* cells (wild type and  $\Delta$ ZnJ6) grown to mid-log phase in HS medium, were  
766 serially diluted. Aliquots (5 $\mu$ l) from each dilution were spotted on HS plates and incubated at  
767 37°C for 1, 2, and 4 h. Control plates were maintained at 23°C. All the plates were then allowed  
768 to grow for 5 days under continuous illumination at 23°C. Decreased growth and an increase in  
769 yellowing of the cells is observed in  $\Delta$ ZnJ6 cells that were incubated at increased durations of  
770 heat treatments. **B,** The reduced growth of the  $\Delta$ ZnJ6 cells is maintained even in a continued  
771 growth when the cells from Panel A were further sub-cultured and replated. After 5 days of  
772 growth, a loopful of cells (1  $\mu$ l loop taken from the cells spotted at a dilution of  $10^5$  cells per 5  
773  $\mu$ l) was resuspended in the HS media, spotted, and allowed to grow for additional 5 days at 23°C.  
774 Mutant  $\Delta$ ZnJ6 cells show reduced growth when treated at 37°C for 2-4 h. **C and D,**  
775 Densitometric analysis of the growth observed in panels A (taken from cells spotted at a dilution  
776 of  $10^3$  cells per 5  $\mu$ l ) and B, respectively, were measured using myImageAnalysis (Thermo  
777 Fisher) software. The histograms were plotted after subtracting the background intensity from the  
778 measured intensity and considering the control as 100%.

779

780

781

## Parsed Citations

- Aigner H, Wilson RH, Bracher A, Calisse L, Bhat JY, Hartl FU, Hayer-Hartl M (2017) Plant RuBisCo assembly in *E. coli* with five chloroplast chaperones including BSD2. *Science* 358: 1272–1278  
Google Scholar: [Author Only](#) [Title Only](#) [Author and Title](#)
- Arne (1979) Thioredoxin Catalyzes the Reduction of Insulin Disulfides by Dithiothreitol and Dihydrolipoamide. *J Biol Chem* 254: 9627–9632  
Google Scholar: [Author Only](#) [Title Only](#) [Author and Title](#)
- Adam Z, Rudella A, van Wijk KJ (2006) Recent advances in the study of Clp, FtsH and other proteases located in chloroplasts. *Curr Opin Plant Biol* 9: 234–240  
Google Scholar: [Author Only](#) [Title Only](#) [Author and Title](#)
- Bohne AV, Schwarz C, Schottkowski M, Lidschreiber M, Piotrowski M, Zerges W, Nickelsen J (2013) Reciprocal Regulation of Protein Synthesis and Carbon Metabolism for Thylakoid Membrane Biogenesis. *PLoS Biol* 11: e1001482  
Google Scholar: [Author Only](#) [Title Only](#) [Author and Title](#)
- Doron L, Goloubinoff P, Shapira M (2018) ZnJ2 is a member of a large chaperone family in the chloroplast of photosynthetic organisms that features a DnaJ-like Zn-finger domain. *Front Mol Biosci* 5: 1–11  
Google Scholar: [Author Only](#) [Title Only](#) [Author and Title](#)
- Erickson E, Wakao S, Niyogi KK (2015) Light stress and photoprotection in *Chlamydomonas reinhardtii*. *Plant J* 82: 449–465  
Google Scholar: [Author Only](#) [Title Only](#) [Author and Title](#)
- Feiz L, Williams-Carrier R, Belcher S, Montano M, Barkan A, Stern DB (2014) A protein with an inactive pterin-4a-carbinolamine dehydratase domain is required for Rubisco biogenesis in plants. *Plant J* 80: 862–869  
Google Scholar: [Author Only](#) [Title Only](#) [Author and Title](#)
- Friedt R, Williams-Carrier R, Merchant SS, Barkan A (2014) Athylakoid membrane protein harboring a DnaJ-type zinc finger domain is required for photosystem I accumulation in plants. *J Biol Chem* 289: 30657–30667  
Google Scholar: [Author Only](#) [Title Only](#) [Author and Title](#)
- Goodin MM (2018) Protein Localization and Interaction Studies in Plants: Toward Defining Complete Proteomes by Visualization. *Adv Virus Res* 100: 117–144  
Google Scholar: [Author Only](#) [Title Only](#) [Author and Title](#)
- Hunt JB, Neece SH, Ginsburg A (1985) The use of 4-(2-pyridylazo)resorcinol in studies of zinc release from *Escherichia coli* aspartate transcarbamoylase. *Anal Biochem* 146: 150–157  
Google Scholar: [Author Only](#) [Title Only](#) [Author and Title](#)
- Jeon SJ, Ishikawa K (2002) Identification and characterization of thioredoxin and thioredoxin reductase from *Aeropyrum pernix* K1. *Eur J Biochem* 269: 5423–5430  
Google Scholar: [Author Only](#) [Title Only](#) [Author and Title](#)
- Klomsiri C, Karplus PA, Poole LB (2011) Cysteine-based redox switches in enzymes. *Antioxidants Redox Signal* 14: 1065–1077  
Google Scholar: [Author Only](#) [Title Only](#) [Author and Title](#)
- Li H, Bai M, Jiang X, Shen R, Wang H, Wang H, Wu H (2020) Cytological evidence of BSD2 functioning in both chloroplast division and dimorphic chloroplast formation in maize leaves. *BMC Plant Biol* 20: 1–8  
Google Scholar: [Author Only](#) [Title Only](#) [Author and Title](#)
- Li X, Patena W, Fauser F, Jinkerson RE, Saroussi S, Meyer MT, Ivanova N, Robertson JM, Yue R, Zhang R, et al (2019) A genome-wide algal mutant library and functional screen identifies genes required for eukaryotic photosynthesis. *Nat Genet* 51: 627–635  
Google Scholar: [Author Only](#) [Title Only](#) [Author and Title](#)
- Lopes KL, Rodrigues RAO, Silva MC, Braga WGS, Silva-Filho MC (2018) The Zinc-finger thylakoid-membrane protein FIP is involved with abiotic stress response in *Arabidopsis thaliana*. *Front Plant Sci* 9: 1–13  
Google Scholar: [Author Only](#) [Title Only](#) [Author and Title](#)
- Lu Y, Hall DA, Last RL (2011) A small zinc finger thylakoid protein plays a role in maintenance of photosystem II in *Arabidopsis thaliana*. *Plant Cell* 23: 1861–1875  
Google Scholar: [Author Only](#) [Title Only](#) [Author and Title](#)
- Nishimura K, Kato Y, Sakamoto W (2017) Essentials of Proteolytic Machineries in Chloroplasts. *Mol Plant* 10: 4–19  
Google Scholar: [Author Only](#) [Title Only](#) [Author and Title](#)
- Nishimura K, Van Wijk KJ (2015) Organization, function and substrates of the essential Clp protease system in plastids. *Biochim Biophys Acta - Bioenerg* 1847: 915–930  
Google Scholar: [Author Only](#) [Title Only](#) [Author and Title](#)
- Perez-Perri JL, Rogell B, Schwarzl T, Stein F, Zhou Y, Rettel M, Brosig A, Hentze MW (2018) Discovery of RNA-binding proteins and characterization of their dynamic responses by enhanced RNA interactome capture. *Nat Commun*. doi: 10.1038/s41467-018-06557-8



Google Scholar: [Author Only](#) [Title Only](#) [Author and Title](#)

**Pulido P, Leister D (2018) Novel DNAJ-related proteins in *Arabidopsis thaliana*. *New Phytol* 217: 480–490**

Google Scholar: [Author Only](#) [Title Only](#) [Author and Title](#)

**Ramundo S, Casero D, Mühlhaus T, Hemme D, Sommer F, Crèvecoeur M, Rahire M, Schroda M, Rusch J, Goodenough U, et al (2014) Conditional depletion of the *Chlamydomonas* chloroplast ClpP protease activates nuclear genes involved in autophagy and plastid protein quality control. *Plant Cell* 26: 2201–2222**

Google Scholar: [Author Only](#) [Title Only](#) [Author and Title](#)

**Sachdeva G, Garg A, Godding D, Way JC, Silver PA (2014) In vivo co-localization of enzymes on RNA scaffolds increases metabolic production in a geometrically dependent manner. *Nucleic Acids Res* 42: 9493–9503**

Google Scholar: [Author Only](#) [Title Only](#) [Author and Title](#)

**Salesse C, Sharwood R, Sakamoto W, Stern D (2017) The rubisco chaperone BSD2 may regulate chloroplast coverage in maize bundle sheath cells. *Plant Physiol* 175: 1624–1633**

Google Scholar: [Author Only](#) [Title Only](#) [Author and Title](#)

**Schröda M, Hemme D, Mühlhaus T (2015) The *Chlamydomonas* heat stress response. *Plant J* 82: 466–480**

Google Scholar: [Author Only](#) [Title Only](#) [Author and Title](#)

**Sedlak J, Lindsay RH (1968) Estimation of total, protein-bound, and nonprotein sulfhydryl groups in tissue with Ellman's reagent. *Anal Biochem* 25: 192–205**

Google Scholar: [Author Only](#) [Title Only](#) [Author and Title](#)

**Segal N, Shapira M (2015) HSP33 in eukaryotes - An evolutionary tale of a chaperone adapted to photosynthetic organisms. *Plant J* 82: 850–860**

Google Scholar: [Author Only](#) [Title Only](#) [Author and Title](#)

**Szabo A, Korszun R, Hartl FU, Flanagan J (1996) Zinc finger-like domain of the molecular chaperone DnaJ is involved in binding to denatured protein substrates. *EMBO J* 15: 408–417**

Google Scholar: [Author Only](#) [Title Only](#) [Author and Title](#)

**Takahashi H, Iwai M, Takahashi Y, Minagawa J (2006) Identification of the mobile light-harvesting complex II polypeptides for state transitions in *Chlamydomonas reinhardtii*. *Proc Natl Acad Sci U S A* 103: 477–482**

Google Scholar: [Author Only](#) [Title Only](#) [Author and Title](#)

**Wittkopp TM, Saroussi S, Yang W, Johnson X, Kim RG, Heinicke ML, Russell JJ, Phuthong W, Dent RM, Broeckling CD, et al (2018) GreenCut protein CPLD49 of *Chlamydomonas reinhardtii* associates with thylakoid membranes and is required for cytochrome b6f complex accumulation. *Plant J* 94: 1023–1037**

Google Scholar: [Author Only](#) [Title Only](#) [Author and Title](#)

**Wostrikoff K, Stern D (2007) Rubisco large-subunit translation is autoregulated in response to its assembly state in tobacco chloroplasts. *Proc Natl Acad Sci U S A* 104: 6466–6471**

Google Scholar: [Author Only](#) [Title Only](#) [Author and Title](#)

**Yosef I, Irihimovitch V, Knopf JA, Cohen I, Orr-Dahan I, Nahum E, Keasar C, Shapira M (2004) RNA Binding Activity of the Ribulose-1,5-bisphosphate Carboxylase/ Oxygenase Large Subunit from *Chlamydomonas reinhardtii*. *J Biol Chem* 279: 10148–10156**

Google Scholar: [Author Only](#) [Title Only](#) [Author and Title](#)
